# Supplementary material for: Characterization of ADME Gene Variation in Colombian Population by Exome Sequencing
Source: Front Pharmacol. 2022 Jun 30;13:931531. doi: 10.3389/fphar.2022.931531 (PMC9280300; doi:10.3389/fphar.2022.931531)
Supplement: Supplementary file 1 [file Table2.xlsx]

## Sheet: Hoja1
Suplemmentary table2. LoF variants (nonsense, frameshift, splicing)
Gen	HGVS c.	HGVS p.	rs	Allele Frequencies	gnomAD_general_allele frequencies	gnomAD_latin_allele frequencies
ABCB1	NM_000927.4:c.2397+3A>G	NA	rs28381943	0.000982318	0.0000518234	0.0000282500
CYP1A1	NM_001319217.1:c.1043-1G>A	NA	NA	0.000982318	NA	NA
CYP2B6	NM_000767.4:c.648delG	NP_000758.1:p.Phe217Leufs*8	rs1310137942	0.000982318	0.0009823180	0.0000320300
CYP2C8	NM_000770.3:c.924T>G	NP_000761.3:p.Tyr308Ter	rs771704932	0.000982318	0.0000079534	0.0000000000
CYP2C8	NM_000770.3:c.556C>T	NP_000761.3:p.Arg186Ter	rs72558195	0.000982318	0.0002347830	0.0000282400
CYP2D6	NM_000106.5:c.631dupG	NP_000097.3:p.Glu211Glyfs*43	rs763609904	0.00294695	0.0005977140	0.0004090000
CYP2E1	NM_000773.3:c.1120C>T	NP_000764.1:p.Arg374Ter	rs370530375	0.000982318	0.0000119400	0.0000000000
CYP3A4	NM_017460.5:c.1461dupA	NP_059488.2:p.Pro488Thrfs*7	rs67666821	0.000982318	0.0003422910	0.0011900000
CYP3A4	NM_017460.5:c.1321_1322delAA	NP_059488.2:p.Asn441Leufs*28	NA	0.00196464	NA	NA
CYP3A5	NM_000777.4:c.802C>T	NP_000768.1:p.Arg268Ter	rs148176345	0.00196464	0.0000676299	0.0000846900
CYP3A5	NM_000777.4:c.746T>A	NP_000768.1:p.Leu249Ter	rs201260783	0.000982318	0.0001692310	0.0002281000
CYP3A5	NM_000777.4:c.92dupG	NP_000768.1:p.Leu32Thrfs*3	rs28383469	0.00196464	0.0069232200	0.0047400000
DPYD	NM_000110.3:c.3034G>T	NP_000101.2:p.Glu1012Ter	rs761584058	0.000982318	0.0000199033	0.0000733400
DPYD	NM_000110.3:c.2554C>T	NP_000101.2:p.Gln852Ter	rs1057517271	0.00294695	NA	NA
GSTT1	NM_000853.3:c.562C>T	NP_000844.2:p.Arg188Ter	rs144686326	0.000982318	0.0003472220	0.0000657300
NAT1	NM_000662.7:c.559C>T	NP_000653.3:p.Arg187Ter	rs5030839	0.00294695	0.0024085600	0.002987
SLC22A2	NM_003058.3:c.606G>A	NP_003049.2:p.Trp202Ter	rs145289005	0.000982318	0.0000636309	0.0000000000
SLC22A6	NM_004790.4:c.777dupT	NP_004781.2:p.Ala260Cysfs*11	rs749849908	0.000982318	0.0000461731	0.0002661000
SLCO1B1	NM_006446.4:c.481+1G>T	NA	rs77271279	0.00392927	0.0023533800	0.0021490000
SLCO1B3	NM_019844.3:c.481+3A>T	NA	rs199631489	0.000982318	0.0000089241	0.0005849000
SLCO1B3	NM_019844.3:c.971-2A>G	NA	rs140033394	0.00294695	0.0000297470	0.0000701700
SLCO1B7	NM_001009562.4:c.829+1G>A	NA	rs151104329	0.000982318	0.0006485830	0.0008475000
SLCO1B7	NM_001009562.4:c.1365dupT	NP_001009562.3:p.Asn456Terfs	rs1312128224	0.000982318	0.0000045681	0.0000382000
SULT1A1	NM_001055.3:c.138T>A	NP_001046.2:p.Tyr46Ter	rs757429126	0.00392927	0.0000119600	0.0000000000
SYCE1	NM_001143763.1:c.271+1G>A	NA	rs201873178	0.000982318	0.0002033430	0.0000283800
TPMT	NM_000367.4:c.547delT	NP_000358.1:p.Cys183Valfs*65	rs1229540950	0.000982318	NA	NA
UGT1A1	NM_000463.2:c.16C>T	NP_000454.1:p.Gln6Ter	rs757429126	0.000982318	0.0000039810	0.0000000000
UGT1A1	NM_000463.2:c.722_723delAG	NP_000454.1:p.Glu241Glyfs*16	rs797046091	0.000982318	0.0000039811	NA
UGT2B15	NM_001076.3:c.1552C>T	NP_001067.2:p.Arg518Ter	rs143480699	0.000982318	0.0008364470	0.0004521000
UGT2B17	NM_001077.3:c.311dupA	NP_001068.1:p.Asn104Lysfs*19	rs369061334	0.000982318	0.0020757900	0.0018100000
UGT2B7	NM_001074.3:c.1317delA	NP_001065.2:p.Glu440Argfs*4	rs755540616	0.000982318	0.0000080105	NA
LoF Loss of Function, HGVS Human Genome Variation Society, rs RefSeq, NA not applicable
