# Supplementary material for: Characterization of ADME Gene Variation in Colombian Population by Exome Sequencing
Source: Front Pharmacol. 2022 Jun 30;13:931531. doi: 10.3389/fphar.2022.931531 (PMC9280300; doi:10.3389/fphar.2022.931531)
Supplement: Supplementary file 2 [file Table3.xlsx]

## Sheet: Hoja1
Suplemmentary table 3. Rare missense variants
Rare missense pathogenic variants classified using coventional and functional prediction framework optimized for pharmacogenetic assessments methods
Gen	HGVS c.	HGVS p.	rs	Allele Frequencies	gnomAD_general_allele frequencies	gnomAD_latin_allele frequencies	Varseq_predictors_N of 6 Predicted Damaging	OPF_score
ABCB1	NM_000927.4:c.3697C>T	NP_000918.2:p.Arg1233Cys	rs563375387	0.00196	0	0.0001	6 of 6 Predicted as Damaging	1
ABCB1	NM_000927.4:c.3400G>A	NP_000918.2:p.Gly1134Arg	rs767536622	0.00098	0	0	6 of 6 Predicted as Damaging	1
ABCB1	NM_000927.4:c.3111T>A	NP_000918.2:p.Phe1037Leu	rs781503569	0.00098	0	0.0003	3 of 6 Predicted as Damaging	0.6
ABCB1	NM_000927.4:c.2320G>C	NP_000918.2:p.Gly774Arg	rs199564535	0.00098	0	0	6 of 6 Predicted as Damaging	1
ABCB1	NM_000927.4:c.1777C>T	NP_000918.2:p.Arg593Cys	rs28381914	0.00098	0.0001	0.0002	4 of 6 Predicted as Damaging	0.8
ABCB1	NM_000927.4:c.1323G>C	NP_000918.2:p.Gln441His	NA	0.00196	NA	NA	5 of 6 Predicted as Damaging	0.8
ABCB1	NM_000927.4:c.958T>G	NP_000918.2:p.Leu320Val	rs201444664	0.00098	0	0	6 of 6 Predicted as Damaging	0.6
ABCB1	NM_000927.4:c.202A>G	NP_000918.2:p.Met68Val	rs865799545	0.00098	0	0	5 of 6 Predicted as Damaging	0.6
ABCC2	NM_000392.4:c.1493G>A	NP_000383.1:p.Arg498His	rs186620377	0.00098	0.0001	0.0001	6 of 6 Predicted as Damaging	1
ABCC2	NM_000392.4:c.1769G>A	NP_000383.1:p.Arg590His	rs751940502	0.00196	0.0001	0.0001	5 of 6 Predicted as Damaging	1
ABCC2	NM_000392.4:c.2843G>T	NP_000383.1:p.Gly948Val	NA	0.00196	NA	NA	5 of 6 Predicted as Damaging	1
ABCC2	NM_000392.4:c.3009G>C	NP_000383.1:p.Trp1003Cys	rs1564695476	0.00098	NA	NA	6 of 6 Predicted as Damaging	1
ABCC2	NM_000392.4:c.3298C>T	NP_000383.1:p.Arg1100Cys	rs142715085	0.00196	0.0005	0.0007	6 of 6 Predicted as Damaging	1
ABCC2	NM_000392.4:c.3455A>C	NP_000383.1:p.Asp1152Ala	rs964875560	0.00098	0	0	5 of 6 Predicted as Damaging	1
ABCC2	NM_000392.4:c.3923G>A	NP_000383.1:p.Arg1308Gln	rs147177143	0.00196	0	0	4 of 6 Predicted as Damaging	0.8
ABCC2	NM_000392.4:c.4079T>C	NP_000383.1:p.Ile1360Thr	rs780758213	0.00098	NA	NA	6 of 6 Predicted as Damaging	1
ABCC2	NM_000392.4:c.4495A>G	NP_000383.1:p.Met1499Val	rs149200446	0.00098	0.0002	0.0001	3 of 6 Predicted as Damaging	0.6
ABCG2	NM_004827.2:c.1582G>A	NP_004818.2:p.Ala528Thr	rs45605536	0.00196	0.0015	0.0019	2 of 6 Predicted as Damaging	0.6
ABCG2	NM_004827.2:c.791T>G	NP_004818.2:p.Leu264Arg	rs779482956	0.00098	0.0001	0.0004	5 of 6 Predicted as Damaging	0.6
ABCG2	NM_004827.2:c.433G>C	NP_004818.2:p.Ala145Pro	rs947226023	0.00098	NA	NA	4 of 6 Predicted as Damaging	0.8
CYP1A1	NM_001319217.1:c.1319A>T	NP_001306146.1:p.Asp440Val	rs758445411	0.00098	0	0	4 of 6 Predicted as Damaging	0.6
CYP1A1	NM_001319217.1:c.1072C>T	NP_001306146.1:p.Arg358Trp	rs371074476	0.00098	0	0.0001	3 of 6 Predicted as Damaging	0.6
CYP1A1	NM_001319217.1:c.1063C>T	NP_001306146.1:p.Arg355Trp	rs191792412	0.00196	0.0002	0.0001	5 of 6 Predicted as Damaging	1
CYP1A1	NM_001319217.1:c.467C>T	NP_001306146.1:p.Ser156Phe	NA	0.00098	NA	NA	4 of 6 Predicted as Damaging	0.8
CYP1A1	NM_001319217.1:c.394G>C	NP_001306146.1:p.Ala132Pro	rs35196245	0.00196	0.001	0.0012	5 of 6 Predicted as Damaging	0.8
CYP1A2	NM_000761.4:c.248C>T	NP_000752.2:p.Thr83Met	rs138652540	0.00098	0.0001	0.0001	2 of 6 Predicted as Damaging	0.6
CYP1A2	NM_000761.4:c.310G>A	NP_000752.2:p.Asp104Asn	rs34067076	0.00098	0.0006	0.001	4 of 6 Predicted as Damaging	0.6
CYP1A2	NM_000761.4:c.643G>A	NP_000752.2:p.Glu215Lys	rs1271532274	0.00098	NA	NA	5 of 6 Predicted as Damaging	0.8
CYP1A2	NM_000761.4:c.1291C>T	NP_000752.2:p.Arg431Trp	rs28399424	0.00098	0.0012	0.0005	6 of 6 Predicted as Damaging	1
CYP1A2	NM_000761.4:c.1370G>A	NP_000752.2:p.Arg457Gln	rs745824533	0.00098	0	0.0001	4 of 6 Predicted as Damaging	0.8
CYP2B6	NM_000767.4:c.353G>A	NP_000758.1:p.Gly118Glu	NA	0.00098	NA	NA	5 of 6 Predicted as Damaging	1
CYP2B6	NM_000767.4:c.692A>G	NP_000758.1:p.His231Arg	NA	0.00196	NA	NA	5 of 6 Predicted as Damaging	0.8
CYP2B6	NM_000767.4:c.769G>A	NP_000758.1:p.Asp257Asn	rs34646544	0.00098	0.0004	0.0002	4 of 6 Predicted as Damaging	0.8
CYP2B6	NM_000767.4:c.967A>G	NP_000758.1:p.Arg323Gly	rs201282330	0.00098	0.0001	0	4 of 6 Predicted as Damaging	0.6
CYP2C19	NM_000769.2:c.257C>A	NP_000760.1:p.Ala86Asp	NA	0.00098	NA	NA	5 of 6 Predicted as Damaging	1
CYP2C19	NM_000769.2:c.343A>G	NP_000760.1:p.Ser115Gly	rs957650583	0.00098	0	0	4 of 6 Predicted as Damaging	1
CYP2C19	NM_000769.2:c.371G>A	NP_000760.1:p.Arg124Gln	rs200346442	0.00098	0.0001	0	4 of 6 Predicted as Damaging	1
CYP2C19	NM_000769.2:c.394C>T	NP_000760.1:p.Arg132Trp	rs149590953	0.00295	0.0005	0.0025	4 of 6 Predicted as Damaging	1
CYP2C19	NM_000769.2:c.680C>T	NP_000760.1:p.Pro227Leu	rs6413438	0.00098	0.0004	0.0001	5 of 6 Predicted as Damaging	1
CYP2C19	NM_000769.2:c.1003C>T	NP_000760.1:p.Arg335Trp	rs368758960	0.00098	0	0.0001	3 of 6 Predicted as Damaging	0.6
CYP2C19	NM_000769.2:c.1255A>G	NP_000760.1:p.Phe419Val	NA	0.01081	NA	NA	NA	0.6
CYP2C9	NM_000771.3:c.374G>A	NP_000762.2:p.Arg125His	rs72558189	0.00098	0.0024	0.0001	4 of 6 Predicted as Damaging	1
CYP2C9	NM_000771.3:c.1034T>C	NP_000762.2:p.Met345Thr	rs201055266	0.00098	0.0002	0.0003	4 of 6 Predicted as Damaging	1
CYP2C9	NM_000771.3:c.1465C>T	NP_000762.2:p.Pro489Ser	rs9332239	0.00098	0.0017	0.0013	4 of 6 Predicted as Damaging	0.8
CYP2D6	NM_000106.5:c.1353G>A	NP_000097.3:p.Met451Ile	rs760940331	0.00098	0	0	5 of 6 Predicted as Damaging	1
CYP2D6	NM_000106.5:c.1346C>A	NP_000097.3:p.Ala449Asp	rs79392742	0.03536	0.0054	0.0349	6 of 6 Predicted as Damaging	1
CYP2D6	NM_000106.5:c.1139G>A	NP_000097.3:p.Arg380His	rs61731586	0.00589	0.0002	0.0004	0 of 6 Predicted as Damaging	0.8
CYP2D6	NM_000106.5:c.1064A>G	NP_000097.3:p.Tyr355Cys	rs202102799	0.05599	0.0022	0.0037	5 of 6 Predicted as Damaging	0.8
CYP2D6	NM_000106.5:c.974C>T	NP_000097.3:p.Pro325Leu	rs140513104	0.00098	0.0002	0.0001	6 of 6 Predicted as Damaging	1
CYP2D6	NM_000106.5:c.800C>A	NP_000097.3:p.Pro267His	rs148769737	0.00196	0.0002	0.0002	3 of 6 Predicted as Damaging	0.6
CYP2D6	NM_000106.5:c.638T>C	NP_000097.3:p.Leu213Pro	rs199535154	0.00196	0.0005	0.0003	4 of 6 Predicted as Damaging	0.8
CYP2D6	NM_000106.5:c.635G>A	NP_000097.3:p.Gly212Glu	rs5030866	0.00295	0.0069	0.0031	1 of 6 Predicted as Damaging	0.6
CYP2D6	NM_000106.5:c.77G>A	NP_000097.3:p.Arg26His	rs28371696	0.00295	0.0022	0.0015	1 of 6 Predicted as Damaging	0.6
CYP2E1	NM_000773.3:c.379C>T	NP_000764.1:p.Arg127Trp	rs772509721	0.00098	0	0	4 of 6 Predicted as Damaging	1
CYP2E1	NM_000773.3:c.1270A>G	NP_000764.1:p.Ser424Gly	rs142767992	0.00098	0.0001	0.0001	4 of 6 Predicted as Damaging	0.6
CYP3A4	NM_017460.5:c.1334T>C	NP_059488.2:p.Met445Thr	rs4986910	0.00098	0.0052	0.0016	5 of 6 Predicted as Damaging	1
CYP3A4	NM_017460.5:c.484C>T	NP_059488.2:p.Arg162Trp	rs57409622	0.00098	0.0003	0.0002	3 of 6 Predicted as Damaging	0.6
CYP3A5	NM_000777.4:c.1064A>G	NP_000768.1:p.Tyr355Cys	rs149888520	0.00098	0.0003	0.0002	5 of 6 Predicted as Damaging	1
CYP3A5	NM_000777.4:c.446T>C	NP_000768.1:p.Ile149Thr	rs142823108	0.00098	0.0001	0	5 of 6 Predicted as Damaging	1
CYP3A5	NM_000777.4:c.299C>A	NP_000768.1:p.Ser100Tyr	rs41279857	0.00196	0.0017	0.0017	3 of 6 Predicted as Damaging	0.8
DPYD	NM_000110.3:c.3029C>T	NP_000101.2:p.Pro1010Leu	NA	0.00098	NA	NA	4 of 6 Predicted as Damaging	0.8
DPYD	NM_000110.3:c.2966G>A	NP_000101.2:p.Cys989Tyr	NA	0.00098	NA	NA	6 of 6 Predicted as Damaging	1
DPYD	NM_000110.3:c.2485G>A	NP_000101.2:p.Asp829Asn	rs199777072	0.01768	0.0005	0.0034	6 of 6 Predicted as Damaging	0.8
DPYD	NM_000110.3:c.2071G>T	NP_000101.2:p.Val691Leu	rs202212118	0.00098	0.0002	0.0003	5 of 6 Predicted as Damaging	0.8
DPYD	NM_000110.3:c.1615G>A	NP_000101.2:p.Gly539Arg	rs142619737	0.00098	0.0002	0.0001	6 of 6 Predicted as Damaging	1
DPYD	NM_000110.3:c.1378G>A	NP_000101.2:p.Gly460Ser	rs1332305607	0.00098	0	0	4 of 6 Predicted as Damaging	0.6
DPYD	NM_000110.3:c.1349C>T	NP_000101.2:p.Ala450Val	rs72975710	0.00098	0.0002	0.0002	6 of 6 Predicted as Damaging	1
DPYD	NM_000110.3:c.1120C>T	NP_000101.2:p.Pro374Ser	rs201785202	0.00098	0	0.0002	6 of 6 Predicted as Damaging	1
DPYD	NM_000110.3:c.218T>G	NP_000101.2:p.Leu73Arg	rs762102298	0.00196	0	0	5 of 6 Predicted as Damaging	0.8
DRD2	NM_000795.3:c.563C>T	NP_000786.1:p.Ala188Val	NA	0.00098	NA	NA	3 of 6 Predicted as Damaging	0.6
GSTP1	NM_000852.3:c.55C>T	NP_000843.1:p.Arg19Cys	rs1354173738	0.00098	0	0	4 of 6 Predicted as Damaging	1
GSTP1	NM_000852.3:c.59G>A	NP_000843.1:p.Met20Lys	NA	0.00098	NA	NA	NA	1
GSTP1	NM_000852.3:c.524C>T	NP_000843.1:p.Pro175Leu	rs772503886	0.00098	0	0	4 of 6 Predicted as Damaging	1
NAT1	NM_000662.7:c.568T>A	NP_000653.3:p.Tyr190Asn	rs1017403408	0.00098	NA	NA	5 of 6 Predicted as Damaging	1
NAT1	NM_000662.7:c.752A>T	NP_000653.3:p.Asp251Val	rs56172717	0.00098	0.0024	0.001	5 of 6 Predicted as Damaging	1
NAT1	NM_000662.7:c.790G>C	NP_000653.3:p.Glu264Gln	rs1017952816	0.00098	NA	NA	5 of 6 Predicted as Damaging	0.6
NAT2	NM_000015.2:c.566T>C	NP_000006.2:p.Ile189Thr	rs541628619	0.00196	0.0002	0.0013	4 of 6 Predicted as Damaging	0.6
SLC15A2	NM_021082.3:c.638A>C	NP_066568.3:p.Gly213Ala	NA	0.00393	NA	NA	NA	0.8
SLC15A2	NM_021082.3:c.1978G>A	NP_066568.3:p.Val660Met	rs745365197	0.00098	0	0	5 of 6 Predicted as Damaging	0.8
SLC22A1	NM_003057.2:c.113G>A	NP_003048.1:p.Gly38Asp	rs35888596	0.00589	0.0038	0.004	5 of 6 Predicted as Damaging	1
SLC22A1	NM_003057.2:c.169G>A	NP_003048.1:p.Glu57Lys	rs1305316089	0.00098	0	0	3 of 6 Predicted as Damaging	0.6
SLC22A1	NM_003057.2:c.182G>A	NP_003048.1:p.Arg61His	rs145649236	0.00098	0.0001	0	3 of 6 Predicted as Damaging	0.8
SLC22A1	NM_003057.2:c.262T>C	NP_003048.1:p.Cys88Arg	rs55918055	0.00196	0.0019	0.0007	5 of 6 Predicted as Damaging	1
SLC22A1	NM_003057.2:c.520G>A	NP_003048.1:p.Gly174Ser	rs751044707	0.00098	0.0001	0.0003	6 of 6 Predicted as Damaging	1
SLC22A1	NM_003057.2:c.524G>A	NP_003048.1:p.Arg175His	rs144273196	0.00098	0.0002	0	6 of 6 Predicted as Damaging	1
SLC22A1	NM_003057.2:c.757G>A	NP_003048.1:p.Gly253Arg	rs539669019	0.00295	0	0	4 of 6 Predicted as Damaging	0.8
SLC22A1	NM_003057.2:c.1058T>C	NP_003048.1:p.Leu353Pro	NA	0.00098	NA	NA	3 of 6 Predicted as Damaging	0.6
SLC22A2	NM_003058.3:c.1460G>A	NP_003049.2:p.Arg487Gln	rs151282335	0.00295	0.0001	0.0004	5 of 6 Predicted as Damaging	1
SLC22A2	NM_003058.3:c.1198C>T	NP_003049.2:p.Arg400Cys	rs8177516	0.00098	0.0012	0.0009	5 of 6 Predicted as Damaging	1
SLC22A2	NM_003058.3:c.1198C>A	NP_003049.2:p.Arg400Ser	rs8177516	0.00098	0.0002	0	5 of 6 Predicted as Damaging	0.8
SLC22A6	NM_004790.4:c.1445A>G	NP_004781.2:p.Tyr482Cys	rs938308762	0.00098	0	0.0001	3 of 6 Predicted as Damaging	0.6
SLC22A6	NM_004790.4:c.991C>A	NP_004781.2:p.Arg331Ser	rs150409056	0.00098	0	0.0001	5 of 6 Predicted as Damaging	1
SLC22A6	NM_004790.4:c.727G>A	NP_004781.2:p.Ala243Thr	rs200609617	0.00098	0	0	2 of 6 Predicted as Damaging	0.8
SLC22A6	NM_004790.4:c.311C>T	NP_004781.2:p.Pro104Leu	rs11568627	0.00196	0.0031	0.0007	5 of 6 Predicted as Damaging	0.8
SLC22A6	NM_004790.4:c.305G>A	NP_004781.2:p.Thr102Lys	NA	0.00098	NA	NA	NA	1
SLC22A6	NM_004790.4:c.149G>A	NP_004781.2:p.Arg50His	rs11568626	0.00786	0.0049	0.0025	2 of 6 Predicted as Damaging	0.6
SLCO1B1	NM_006446.4:c.170G>A	NP_006437.3:p.Arg57Gln	rs61760182	0.00098	0.0004	0.0001	5 of 6 Predicted as Damaging	1
SLCO1B1	NM_006446.4:c.485G>A	NP_006437.3:p.Cys162Tyr	rs138374684	0.00098	0	0	5 of 6 Predicted as Damaging	0.6
SLCO1B1	NM_006446.4:c.758G>A	NP_006437.3:p.Arg253Gln	rs11045853	0.00098	0.0003	0.0006	4 of 6 Predicted as Damaging	0.8
SLCO1B1	NM_006446.4:c.1837T>G	NP_006437.3:p.Cys613Gly	NA	0.00098	NA	NA	5 of 6 Predicted as Damaging	1
SLCO1B3	NM_019844.3:c.80T>G	NP_062818.1:p.Phe27Cys	rs377570761	0.00098	0.0001	0.0001	4 of 6 Predicted as Damaging	0.6
SLCO1B3	NM_019844.3:c.703G>A	NP_062818.1:p.Val235Met	rs1013531945	0.00098	0	0	5 of 6 Predicted as Damaging	0.6
SLCO1B3	NM_019844.3:c.740T>A	NP_062818.1:p.Ile247Lys	rs764151105	0.00098	0.0002	0.0007	5 of 6 Predicted as Damaging	1
SLCO1B3	NM_019844.3:c.1309G>A	NP_062818.1:p.Gly437Ser	rs61673910	0.00098	0.0003	0.0006	5 of 6 Predicted as Damaging	1
SLCO1B7	NM_001009562.4:c.59G>A	NP_001009562.3:p.Gly20Asp	NA	0.00098	NA	NA	5 of 6 Predicted as Damaging	1
SLCO1B7	NM_001009562.4:c.953A>G	NP_001009562.3:p.Gln318Arg	rs148780326	0.00098	0.0007	0.0003	5 of 6 Predicted as Damaging	1
SULT1A1	NM_001055.3:c.680C>T	NP_001046.2:p.Thr227Met	rs150459557	0.00295	0.0024	0.0008	5 of 6 Predicted as Damaging	1
SULT1A1	NM_001055.3:c.606G>C	NP_001046.2:p.Arg202Ser	rs1407307657	0.00098	0	0	1 of 6 Predicted as Damaging	0.8
SULT1A1	NM_001055.3:c.388C>T	NP_001046.2:p.Arg130Cys	rs768899038	0.00098	0	0	5 of 6 Predicted as Damaging	1
SULT1A1	NM_001055.3:c.372G>T	NP_001046.2:p.Lys124Asn	rs1321148248	0.00098	0	0	6 of 6 Predicted as Damaging	1
UGT1A1,UGT1A3,UGT1A4,UGT1A5,UGT1A6,UGT1A7,UGT1A8,UGT1A9,UGT1A10	NM_000463.2:c.1411G>A,NM_019075.2:c.1402G>A,NM_019093.2:c.1414G>A,NM_007120.2:c.1414G>A,NM_019078.1:c.1414G>A,NM_001072.3:c.1408G>A,NM_019077.2:c.1402G>A,NM_019076.4:c.1402G>A,NM_021027.2:c.1402G>A	NP_000454.1:p.Ala471Thr,NP_061948.1:p.Ala468Thr,NP_061966.1:p.Ala472Thr,NP_009051.1:p.Ala472Thr,NP_061951.1:p.Ala472Thr,NP_001063.2:p.Ala470Thr,NP_061950.2:p.Ala468Thr,NP_061949.3:p.Ala468Thr,NP_066307.1:p.Ala468Thr	rs775532505	0.00098	0.0001	0.0001	5 of 6 Predicted as Damaging	0.8
UGT2B15	NM_001076.3:c.1055C>T	NP_001067.2:p.Thr352Ile	rs148583958	0.00098	0.0032	0.0013	5 of 6 Predicted as Damaging	1
UGT2B15	NM_001076.3:c.845A>C	NP_001067.2:p.His282Pro	rs147882612	0.00098	0.0013	0.0007	5 of 6 Predicted as Damaging	1
UGT2B15	NM_001076.3:c.514A>C	NP_001067.2:p.Ser172Arg	rs200638397	0.00098	0.0006	0.0005	3 of 6 Predicted as Damaging	0.8
UGT2B17	NM_001077.3:c.1337T>C	NP_001068.1:p.Leu446Ser	rs138121512	0.00982	0.0026	0.0072	3 of 6 Predicted as Damaging	1
UGT2B17	NM_001077.3:c.989C>T	NP_001068.1:p.Ala330Val	rs143148973	0.00196	0.0001	0	3 of 6 Predicted as Damaging	0.6
UGT2B17	NM_001077.3:c.440A>T	NP_001068.1:p.Asp147Val	rs143522336	0.00393	0.0068	0.0109	4 of 6 Predicted as Damaging	1
UGT2B7	NM_001074.3:c.505G>A	NP_001065.2:p.Val169Met	NA	0.00098	NA	NA	2 of 6 Predicted as Damaging	0.6
UGT2B7	NM_001074.3:c.644T>A	NP_001065.2:p.Ile215Asn	rs142000539	0.00196	0.0005	0.0003	4 of 6 Predicted as Damaging	0.6
UGT2B7	NM_001074.3:c.1018G>C	NP_001065.2:p.Asp340His	rs569519019	0.00098	0.0003	0	4 of 6 Predicted as Damaging	0.6
VKORC1	NM_024006.5:c.379G>A	NP_076869.1:p.Val127Met	rs777707816	0.00098	0	0.0001	4 of 6 Predicted as Damaging	0.6
HGVS Human Genome Variation Society, rs RefSeq, OPF functional prediction framework optimized for pharmacogenetic assessments, NA not applicable
