# Supplementary material for: Characterization of ADME Gene Variation in Colombian Population by Exome Sequencing
Source: Front Pharmacol. 2022 Jun 30;13:931531. doi: 10.3389/fphar.2022.931531 (PMC9280300; doi:10.3389/fphar.2022.931531)
Supplement: Supplementary file 4 [file Table1.xlsx]

## Sheet: Hoja1
Suplemmentary Table 1. PharmGKB & Clinvar clincal pharmacogenetic effect variants
Gen	HGVS c.	HGVS p.	rs	Allele Frequencies	gnomAD_general_allele frequencies	p_value	p_value_bonferroni correction	gnomAD_latin_allele frequencies	p_value	p_value_bonferroni correction	HWE
ABCB1	NM_000927.4:c.1236T>C	NP_000918.2:p.Gly412=	rs1128503	0.382	0.614	<0.01	<0.01†	0.534	<0.01	<0.01†	0.000
ABCB1	NM_000927.4:c.2677T>G	NP_000918.2:p.Ser893Ala	rs2032582	0.523	0.637	<0.01	<0.01†	0.562	0.091	1	0.156
ABCB1	NM_000927.4:c.3435T>C	NP_000918.2:p.Ile1145=	rs1045642	0.502	0.560	<0.01	0.03†	0.543	0.081	1	0.824
ABCB1	NM_000927.4:c.287-25G>T	NA	rs2235015	0.162	0.216	<0.01	<0.01†	0.137	0.139	1	0.391
ABCB1	NM_000927.4:c.2481+24G>A	NA	rs2235040	0.086	0.115	<0.01	0.70	0.099	0.340	1	0.218
ABCB1	NM_000927.4:c.61A>G	NP_000918.2:p.Asn21Asp	rs9282564	0.047	0.090	<0.01	<0.01†	0.028	0.035	1	0.392
ABCB1	NM_000927.4:c.2677T>A	NP_000918.2:p.Ser893Thr	rs2032582	0.029	0.025	0.340	1	0.052	0.012	1	0.000
ABCB1	NM_000927.4:c.1199G>A	NP_000918.2:p.Ser400Asn	rs2229109	0.012	0.025	<0.01	0.83	0.026	0.023	1	0.788
ABCC2	NM_000392.4:c.3972C>T	NP_000383.1:p.Ile1324=	rs3740066	0.306	0.326	0.184	1	0.354	0.030	1	0.088
ABCC2	NM_000392.4:c.1249G>A	NP_000383.1:p.Val417Ile	rs2273697	0.153	0.177	0.049	1	0.154	0.963	1	0.313
ABCC2	NM_000392.4:c.-24C>T	NA	rs717620	0.119	0.159	<0.01	0.08	0.131	0.433	1	0.732
ABCC2	NM_000392.4:c.3563T>A	NP_000383.1:p.Val1188Glu	rs17222723	0.041	0.048	0.300	1	0.046	0.617	1	0.881
ABCC2	NM_000392.4:c.1446C>G	NP_000383.1:p.Thr482=	rs113646094	0.003	0.012	<0.01	1	0.004	0.822	1	0.947
ABCG2	NM_004827.2:c.421C>A	NP_004818.2:p.Gln141Lys	rs2231142	0.154	0.094	<0.01	<0.01†	0.189	0.048	1	0.971
CYP1A1	NM_001319217.1:c.1384A>G	NP_001306146.1:p.Ile462Val	rs1048943	0.190	0.050	<0.01	<0.01†	0.315	<0.01	<0.01†	0.002
CYP1A2	NM_000761.4:c.1548C>T	NP_000752.2:p.Asn516=	rs2470890	0.256	0.438	<0.01	<0.01†	0.291	0.092	1	0.047
CYP2A6	NM_000762.5:c.493+23G>T	NA	rs8192726	0.040	0.083	<0.01	<0.01†	0.047	0.467	1	0.842
CYP2B6	NM_000767.4:c.485-18C>T	NA	rs4803419	0.292	0.282	0.475	1	0.455	<0.01	<0.01†	0.000
CYP2B6	NM_000767.4:c.785A>G	NP_000758.1:p.Lys262Arg	rs2279343	0.272	0.271	0.922	1	0.297	0.242	1	0.000
CYP2B6	NM_000767.4:c.516G>T	NP_000758.1:p.Gln172His	rs3745274	0.250	0.263	0.358	1	0.297	0.024	1	0.000
CYP2B6	NM_000767.4:c.64C>T	NP_000758.1:p.Arg22Cys	rs8192709	0.038	0.052	0.056	1	0.041	0.744	1	0.132
CYP2B6	NM_000767.4:c.1459C>T	NP_000758.1:p.Arg487Cys	rs3211371	0.037	0.086	<0.01	<0.01†	0.046	0.343	1	0.111
CYP2B6	NM_000767.4:c.646-17C>T	NA	rs12721646	0.014	0.050	<0.01	<0.01†	0.012	0.717	1	0.753
CYP2B6	NM_000767.4:c.983T>C	NP_000758.1:p.Ile328Thr	rs28399499	0.008	0.020	<0.01	0.69	0.007	0.852	1	0.858
CYP2C19	NM_000769.2:c.681G>A	NP_000760.1:p.Pro227=	rs4244285	0.087	0.167	<0.01	<0.01†	0.129	<0.01	0.50	0.538
CYP2C19	NM_000769.2:c.1A>G	NP_000760.1:p.Met1Val	rs28399504	0.004	0.002	0.066	1	0.001	0.253	1	0.929
CYP2C8	NM_000770.3:c.1196A>G	NP_000761.3:p.Lys399Arg	rs10509681	0.074	0.075	0.885	1	0.080	0.598	1	0.878
CYP2C8	NM_000770.3:c.416G>A	NP_000761.3:p.Arg139Lys	rs11572080	0.061	0.075	0.093	1	0.080	0.103	1	0.931
CYP2C8	NM_000770.3:c.332-36G>A	NA	rs11572076	0.018	0.040	<0.01	0.04†	0.007	0.043	1	0.685
CYP2C9	NM_000771.3:c.430C>T	NP_000762.2:p.Arg144Cys	rs1799853	0.079	0.083	0.657	1	0.084	0.663	1	0.600
CYP2C9	NM_000771.3:c.1075A>C	NP_000762.2:p.Ile359Leu	rs1057910	0.029	0.049	<0.01	0.59	0.045	0.078	1	0.016
CYP2C9	NM_000771.3:c.449G>A	NP_000762.2:p.Arg150His	rs7900194	0.008	0.017	0.022	1	0.001	0.038	1	0.858
CYP2C9	NM_000771.3:c.1003C>T	NP_000762.2:p.Arg335Trp	rs28371685	0.003	0.007	0.146	1	0.000	0.114	1	0.947
CYP2D6	NM_000106.5:c.886T>C	NP_000097.3:p.Cys296Arg	rs16947	0.334	0.614	<0.01	<0.01†	0.688	<0.01	<0.01†	0.000
CYP2D6	NM_000106.5:c.100C>T	NP_000097.3:p.Pro34Ser	rs1065852	0.094	0.192	<0.01	<0.01†	0.136	<0.01	0.65	0.001
CYP2D6	NM_000106.5:c.506-1G>A	NA	rs3892097	0.134	0.137	0.725	1	0.114	0.210	1	0.060
CYP2D6	NM_000106.5:c.320C>T	NP_000097.3:p.Thr107Ile	rs28371706	0.011	0.052	<0.01	<0.01†	0.011	0.981	1	0.000
CYP2D6	NM_000106.5:c.320C>A	NP_000097.3:p.Thr107Asn	rs28371706	0.009	0.000	<0.01	<0.01†	0.008	0.902	1	0.841
CYP2D6	NM_000106.5:c.454delT	NP_000097.3:p.Trp152Glyfs*2	rs5030655	0.002	0.008	0.017	1	0.004	0.050	1	0.965
CYP2E1	NM_000773.3:c.1263T>C	NP_000764.1:p.Phe421=	rs2515641	0.755	0.749	0.663	1	0.832	<0.01	0.01†	0.000
CYP3A4	NM_017460.5:c.1026+12G>A	NA	rs2242480	0.208	0.291	<0.01	<0.01†	0.370	<0.01	<0.01†	0.000
CYP3A4	NM_017460.5:c.1334T>C	NP_059488.2:p.Met445Thr	rs4986910	0.001	0.007	0.026	1	0.001	0.897	1	0.982
CYP3A5	NM_000777.4:c.624G>A	NP_000768.1:p.Lys208=	rs10264272	0.024	0.036	0.031	1	0.004	<0.01	0.04†	0.001
CYP3A5	NM_000777.4:c.*14T>C	NA	rs15524	0.223	0.238	0.266	1	0.196	0.151	1	0.555
CYP3A5	NM_000777.4:c.1035dupT	NP_000768.1:p.Thr346Tyrfs*3	rs41303343	0.005	0.030	<0.01	<0.01†	0.009	0.242	1	0.911
DPYD	NM_000110.4:c.85C>T	NP_000101.2:p.Arg29Cys	rs1801265	0.698	0.720	0.141	1	0.776	<0.01	0.02†	0.000
DPYD	NM_000110.4:c.1627A>G	NP_000101.2:p.Ile543Val	rs1801159	0.216	0.175	<0.01	0.11	0.264	0.016	1	0.269
DPYD	NM_000110.4:c.1896T>C	NP_000101.2:p.Phe632=	rs17376848	0.077	0.046	<0.01	<0.01†	0.085	0.503	1	0.213
DPYD	NM_000110.4:c.496A>G	NP_000101.2:p.Met166Val	rs2297595	0.045	0.090	<0.01	<0.01†	0.059	0.176	1	0.286
DPYD	NM_000110.4:c.2194G>A	NP_000101.2:p.Val732Ile	rs1801160	0.034	0.033	0.779	1	0.041	0.429	1	0.422
DPYD	NM_000110.4:c.1601G>A	NP_000101.2:p.Ser534Asn	rs1801158	0.023	0.011	<0.01	0.16	0.013	0.122	1	0.602
DPYD	NM_000110.3:c.1236G>A	NP_000101.2:p.Glu412=	rs56038477	0.003	0.013	<0.01	0.55	0.008	0.116	1	0.947
DPYD	NM_000110.3:c.1905+1G>A	NA	rs3918290	0.001	0.007	0.029	1	0.001	0.897	1	0.982
DRD2	NM_000795.3:c.939T>C	NP_000786.1:p.His313=	rs6275	0.567	0.595	0.075	1	0.647	<0.01	0.06	0.038
DRD2	NM_000795.3:c.957C>T	NP_000786.1:p.Pro319=	rs6277	0.314	0.379	<0.01	<0.01†	0.298	0.456	1	0.028
GSTP1	NM_000852.3:c.313A>G	NP_000843.1:p.Ile105Val	rs1695	0.420	0.353	<0.01	<0.01†	0.472	0.026	1	0.068
GSTP1	NM_000852.3:c.341C>T	NP_000843.1:p.Ala114Val	rs1138272	0.028	0.061	<0.01	<0.01†	0.026	0.835	1	0.308
NAT2	NM_000015.2:c.590G>A	NP_000006.2:p.Arg197Gln	rs1799930	0.209	0.270	<0.01	<0.01†	0.150	<0.01	0.14	0.009
NAT2	NM_000015.2:c.282C>T	NP_000006.2:p.Tyr94=	rs1041983	0.353	0.356	0.813	1	0.290	<0.01	0.58	0.135
NAT2	NM_000015.2:c.803G>A	NP_000006.2:p.Arg268Lys	rs1208	0.648	0.599	<0.01	0.24	0.637	0.599	1	0.011
NAT2	NM_000015.2:c.341T>C	NP_000006.2:p.Ile114Thr	rs1801280	0.322	0.385	<0.01	0.01†	0.342	0.365	1	0.295
NAT2	NM_000015.2:c.481C>T	NP_000006.2:p.Leu161=	rs1799929	0.312	0.361	<0.01	0.19	0.332	0.363	1	0.371
NAT2	NM_000015.2:c.857G>A	NP_000006.2:p.Gly286Glu	rs1799931	0.130	0.041	<0.01	<0.01†	0.131	0.937	1	0.176
SLC15A2	NM_021082.3:c.1048C>T	NP_066568.3:p.Leu350Phe	rs2257212	0.126	0.455	<0.01	<0.01†	0.309	<0.01	<0.01†	0.005
SLC22A1	NM_003057.2:c.480G>C	NP_003048.1:p.Leu160Phe	rs683369	0.854	0.846	0.499	1	0.914	<0.01	0.01†	0.001
SLC22A1	NM_003057.2:c.1222A>G	NP_003048.1:p.Met408Val	rs628031	0.734	0.638	<0.01	<0.01†	0.792	<0.01	0.47	0.179
SLC22A1	NM_003057.2:c.1260_1262delGAT	NP_003048.1:p.Met420del	rs72552763	0.232	0.151	<0.01	<0.01†	0.243	0.415	1	0.278
SLC22A1	NM_003057.2:c.181C>T	NP_003048.1:p.Arg61Cys	rs12208357	0.036	0.052	0.026	1	0.018	0.015	1	0.678
SLC22A1	NM_003057.2:c.1022C>T	NP_003048.1:p.Pro341Leu	rs2282143	0.035	0.035	0.990	1	0.031	0.572	1	0.408
SLC22A1	NM_003057.2:c.1201G>A	NP_003048.1:p.Gly401Ser	rs34130495	0.012	0.018	0.169	1	0.011	0.811	1	0.788
SLC22A2	NM_003058.3:c.808T>G	NP_003049.2:p.Ser270Ala	rs316019	0.894	0.892	0.847	1	0.930	<0.01	0.82	0.000
SLCO1B1	NM_006446.4:c.597C>T	NP_006437.3:p.Phe199=	rs2291075	0.353	0.453	<0.01	<0.01†	0.279	<0.01	0.09	0.473
SLCO1B1	NM_006446.4:c.388A>G	NP_006437.3:p.Asn130Asp	rs2306283	0.425	0.530	<0.01	<0.01†	0.430	0.842	1	0.072
SLCO1B1	NM_006446.4:c.521T>C	NP_006437.3:p.Val174Ala	rs4149056	0.153	0.136	0.109	1	0.111	<0.01	1	0.039
SLCO1B1	NM_006446.4:c.463C>A	NP_006437.3:p.Pro155Thr	rs11045819	0.053	0.111	<0.01	<0.01†	0.082	0.014	1	0.002
SLCO1B3,	NM_019844.3:c.334T>G	NP_062818.1:p.Ser112Ala	rs4149117	0.659	0.705	<0.01	0.25	0.809	<0.01	<0.01†	0.000
SLCO1B3,	NM_019844.3:c.699G>A	NP_062818.1:p.Met233Ile	rs7311358	0.785	0.705	<0.01	<0.01†	0.809	0.208	1	0.006
SULT1A1	NM_001055.3:c.638G>A	NP_001046.2:p.Arg213His	rs1042028	0.327	0.313	0.327	1	0.370	0.056	1	0.000
TPMT	NM_000367.4:c.719A>G	NP_000358.1:p.Tyr240Cys	rs1142345	0.039	0.041	0.812	1	0.047	0.403	1	0.009
TPMT	NM_000367.4:c.460G>A	NP_000358.1:p.Ala154Thr	rs1800460	0.038	0.025	<0.01	0.88	0.038	0.957	1	0.007
UGT2B15	NM_001076.3:c.253T>G	NP_001067.2:p.Tyr85Asp	rs1902023	0.421	0.537	<0.01	<0.01†	0.593	<0.01	<0.01†	0.000
UGT2B7	NM_001074.3:c.1059C>G	NP_001065.2:p.Leu353=	rs4292394	0.232	0.577	<0.01	<0.01†	0.691	<0.01	<0.01†	0.000
UGT2B7	NM_001074.3:c.802T>C	NP_001065.2:p.Tyr268His	rs7439366	0.607	0.558	<0.01	0.27	0.686	<0.01	0.06	0.000
UGT2B7	NM_001074.3:c.735A>G	NP_001065.2:p.Thr245=	rs28365062	0.297	0.155	<0.01	<0.01†	0.342	0.040	1	0.640
UGT2B7	NM_001074.3:c.372A>G	NP_001065.2:p.Arg124=	rs28365063	0.089	0.149	<0.01	<0.01†	0.106	0.243	1	0.260
UGT2B7	NM_001074.3:c.211G>T	NP_001065.2:p.Ala71Ser	rs12233719	0.012	0.009	0.360	1	0.005	0.100	1	0.788
VKORC1	NM_024006.5:c.358C>T	NP_076869.1:p.Leu120=	rs7200749	0.028	0.055	<0.01	0.02†	0.009	<0.01	0.65	0.308
VKORC1	NM_024006.5:c.36G>A	NP_076869.1:p.Arg12=	rs55894764	0.013	0.015	0.585	1	0.020	0.213	1	0.001
VKORC1	NM_024006.5:c.106G>T	NP_076869.1:p.Asp36Tyr	rs61742245	0.002	0.001	0.079	1	0.001	0.673	1	0.965
HGVS Human Genome Variation Society, rs RefSeq, HWE Hardy-Weinberg equilibrium, NA not applicable
† Statistically significant
