# Supplementary material for: Characterization of ADME Gene Variation in Colombian Population by Exome Sequencing
Source: Front Pharmacol. 2022 Jun 30;13:931531. doi: 10.3389/fphar.2022.931531 (PMC9280300; doi:10.3389/fphar.2022.931531)
Supplement: Supplementary file 5 [file Table5.xlsx]

## Sheet: Hoja2
Suplemmentary table 5. Molecular variant types per gen
		PharmGKB & Clinvar clinical pharmacogenetic effect variants							Rare missense and LOF variants
Category	Gen	Missense	Nonsense	Indel	Splicing	Synonym	3´ UTR	Total	Missense	Nonsense	Indel	Splicing	Total
Transporter	ABCB1	4	0	0	2	2	0	8	8	0	0	1	9
Transporter	ABCC2	2	0	0	1	2	0	5	9	0	0	0	9
Transporter	ABCG2	1	0	0	0	0	0	1	3	0	0	0	3
Phase I	CYP1A1	1	0	0	0	0	0	1	5	0	0	1	6
Phase I	CYP1A2	0	0	0	0	1	0	1	5	0	0	0	5
Phase I	CYP2A6	0	0	0	1	0	0	1	0	0	0	0	0
Phase I	CYP2B6	5	0	0	2	0	0	7	4	0	1	0	5
Phase I	CYP2C19	1	0	0	0	1	0	2	7	0	0	0	7
Phase I	CYP2C8	2	0	0	1	0	0	3	0	2	0	0	2
Phase I	CYP2C9	4	0	0	0	0	0	4	3	0	0	0	3
Phase I	CYP2D6	4	0	1	1	0	0	6	9	0	1	0	10
Phase I	CYP2E1	0	0	0	0	1	0	1	2	1	0	0	3
Phase I	CYP3A4	1	0	0	1	0	0	2	2	0	2	0	4
Phase I	CYP3A5	0	0	1	0	1	1	3	3	2	1	0	6
Phase I	DPYD	5	0	0	1	2	0	8	9	2	0	0	11
Others	DRD2	0	0	0	0	2	0	2	1	0	0	0	1
Phase II	GSTP1	2	0	0	0	0	0	2	3	0	0	0	3
Phase II	GSTT1	0	0	0	0	0	0	0	0	1	0	0	1
Phase II	NAT1	0	0	0	0	0	0	0	3	1	0	0	4
Phase II	NAT2	4	0	0	0	2	0	6	1	0	0	0	1
Transporter	SLC15A2	1	0	0	0	0	0	1	2	0	0	0	2
Transporter	SLC22A1	5	0	1	0	0	0	6	8	0	0	0	8
Transporter	SLC22A2	1	0	0	0	0	0	1	3	1	0	0	4
Transporter	SLC22A6	0	0	0	0	0	0	0	6	0	1	0	7
Transporter	SLCO1B1	3	0	0	0	1	0	4	4	0	0	1	5
Transporter	SLCO1B3	2	0	0	0	0	0	2	4	0	0	2	6
Transporter	SLCO1B7	0	0	0	0	0	0	0	2	0	1	1	4
Phase II	SULT1A1	1	0	0	0	0	0	1	4	1	0	0	5
Phase II	SYCE1	0	0	0	0	0	0	0	0	0	0	1	1
Phase II	TPMT	2	0	0	0	0	0	2	0	0	1	0	1
Phase II	UGT1A1	0	0	0	0	0	0	0	1	1	1	0	3
Phase II	UGT2B15	1	0	0	0	0	0	1	3	1	0	0	4
Phase II	UGT2B17	0	0	0	0	0	0	0	3	0	1	0	4
Phase II	UGT2B7	2	0	0	0	3	0	5	3	0	1	0	4
Pharmacodynamic	VKORC1	1	0	0	0	2	0	3	1	0	0	0	1
	Total	55	0	3	10	20	1	89	121	13	11	7	152
LOF Loss of Funtion
